# Supplementary material
Source: MDPI journal article supplement (https://www.mdpi.com/2073-4344/12/6/647)
Supplement: s1 [file s1]

# Functional Characterization of Recombinant Raw Starch Degrading $\alpha$ -Amylase from *Roseateles terrae* HL11 and Its Application on Cassava Pulp Saccharification

Daran Prongjit <sup>1</sup>, Hataikarn Lekakarn <sup>1,\*</sup>, Benjarat Bunterngsook <sup>2</sup>, Katesuda Aiewviriyasakul <sup>2</sup>, Wipawee Sritusnee <sup>2</sup> and Verawat Champreda <sup>2</sup>

<sup>1</sup> Department of Biotechnology, Faculty of Science and Technology, Thammasat University, Rangsit Campus, Khlong Nueng, Khlong Luang, Pathum Thani 12120, Thailand; daranprongjit@gmail.com (D.P.)

<sup>2</sup> Enzyme Technology Research Team, Biorefinery Technology and Bioproduct Research Group, National Center for Genetic Engineering and Biotechnology, 113 Thailand Science Park, Phahonyothin Road, Khlong Nueng, Khlong Luang, Pathum Thani 12120, Thailand; benjarat.bun@biotec.or.th (B.B.); katesuda.aie@biotec.or.th (K.A.); wipawee.sri@ncr.nstda.or.th (W.S.); verawat@biotec.or.th (V.C.)

\* Correspondence: hataikarn.lek@sci.tu.ac.th; Tel.: +662-564-4441 (ext. 2452)

**Table S1.** Summary on characteristics of reported raw starch degrading  $\alpha$ -amylases.

| Organism                            | Enzyme  | Optimal working condition | Starch binding domain | Family_subfamily | Specific activity (U/mg)         | Kinetic parameter values                                                     | Reference     |
|-------------------------------------|---------|---------------------------|-----------------------|------------------|----------------------------------|------------------------------------------------------------------------------|---------------|
| <b>Gram-negative bacteria</b>       |         |                           |                       |                  |                                  |                                                                              |               |
| <i>Roseateles terrae</i> HL11       | HL11Amy | pH 4.0, 50 °C             | CBM20                 | GH13_32          | 6270 $\pm$ 70                    | K <sub>m</sub> 4.82 mg/ml<br>V <sub>max</sub> 19,800 U/mg (soluble starch)   | In this study |
| <i>Aeromonas salmonicida</i> ssp    | AmyASS  | pH 6.0, 40 °C             | No SBD                | NM               | 23.5 $\pm$ 1.6 (raw rice starch) | NM                                                                           | [1]           |
| <i>Bacteroides thetaiotaomicron</i> | SusG    | pH 7.0, 37 °C             | CBM58                 | GH13             | NM                               | NM                                                                           | [2]           |
| <i>Corallococcus</i> sp. Strain EGB | AmyM    | pH 7.0, 50 °C             | NM                    | GH13             | 14,000                           | K <sub>m</sub> 6.61 mg/ml<br>V <sub>max</sub> 44,301.5 U/mg (soluble starch) | [3]           |

| Organism                              | Enzyme  | Optimal working condition | Starch binding domain | Family_subfamily   | Specific activity (U/mg) | Kinetic parameter values                                                                                                                    | Reference |
|---------------------------------------|---------|---------------------------|-----------------------|--------------------|--------------------------|---------------------------------------------------------------------------------------------------------------------------------------------|-----------|
| <b>Gram positive bacteria</b>         |         |                           |                       |                    |                          |                                                                                                                                             |           |
| <i>Alicyclobacillus</i> sp. A4        | AmyA4   | pH 4.2, 75 °C             | NM                    | NM                 | 1,630                    | NM                                                                                                                                          | [4]       |
| <i>Anoxybacillus flavothermus</i>     | AFA     | pH 7.0, 40 °C             | CBM20                 | NM                 | 17 (PNP)                 | NM                                                                                                                                          | [5]       |
| <i>Bacillus amyloliquefaciens</i>     | -       | pH 5.0, 50 °C             | No SBD                | NM                 | 72                       | K <sub>m</sub> 3.076 mg<br>V <sub>max</sub> 4.11 mg/min<br>(soluble starch)                                                                 | [6]       |
| <i>Bacillus aquimaris</i> MKSC 6.2    | BaqA    | pH 6.5                    | No SBD                | GH13_new subfamily | NM                       | NM                                                                                                                                          | [7]       |
| <i>Bacillus megaterium</i> NL3        | BmaN2   | pH 6.0, 60 °C             | No SBD                | GH13_36            | 28.7 ± 1.4               | K <sub>m</sub> 5.1 ± 0.9 mg/ml<br>V <sub>max</sub> 141.6 ± 8.1 µg/min<br>k <sub>cat</sub> 71.5 1/s<br>(soluble starch)                      | [8]       |
| <i>Bacillus</i> sp. ALSHL3            | -       | pH 6.0, 60 °C             | NM                    | NM                 | NM                       | K <sub>m</sub> 4.79 mg/ml<br>V <sub>max</sub> 0.332 mM/min                                                                                  | [9]       |
| <i>Bacillus subtilis</i> strain AS01a | AmyBS-I | pH 6.0, 70 °C             | NM                    | NM                 | NM                       | K <sub>m</sub> 2.7 mg/ml<br>V <sub>max</sub> 454 U/ml                                                                                       | [10]      |
| <i>Streptomyces badius</i> DB-1       |         | pH 6.0, 50 °C             |                       |                    | 246.9                    | K <sub>m</sub> 1.12 mg/ml<br>V <sub>max</sub> 454 U/mg                                                                                      | [11]      |
| Marine bacteria                       | AmyP    | pH 7.5, 40 °C             | CBM69                 | GH13_37            | 453.5 ± 10.7             | K <sub>m</sub> 2.5 mg/ml<br>k <sub>cat</sub> 1.53 (1/s) (gel rice)<br>K <sub>m</sub> 13.4 (mg/ml)<br>k <sub>cat</sub> 0.57 (1/s) (raw rice) | [12]      |
| <b>Fungi and yeast</b>                |         |                           |                       |                    |                          |                                                                                                                                             |           |
| <i>Geotrichum candidum</i> CMSS06     | -       | pH 7.0, 40 °C             | NM                    | NM                 | 394.7 mU/ml              | NM                                                                                                                                          | [13]      |

| Organism                              | Enzyme   | Optimal working condition | Starch binding domain               | Family_subfamily | Specific activity (U/mg) | Kinetic parameter values | Reference |
|---------------------------------------|----------|---------------------------|-------------------------------------|------------------|--------------------------|--------------------------|-----------|
| <i>Rhizomucor</i> sp.                 | RA       | pH 4.5, 32 °C             | Modified CBM20 from <i>A. niger</i> | NM               | NM                       | NM                       | [14]      |
| <i>Saccharomycopsis fibuligera</i> KZ | Sfamy KZ | pH 5.1-6.4, 45 °C         | No SBD                              | GH13_1           | 120–125                  | NM                       | [15]      |

NM= data was not mentioned

**Table S2.** List of GH13\_32  $\alpha$ -amylases for sequence alignment of CBM20.

| Organism                                        | Accession no. |
|-------------------------------------------------|---------------|
| <i>Botryobasidium botryosum</i> FD-172 SS1      | KDQ06010.1    |
| <i>Jaapia argillacea</i> MUCL 33604             | KDQ58058.1    |
| <i>Jaapia argillacea</i> MUCL 33604             | KDQ58060.1    |
| <i>Plicaturopsis crispa</i> FD-325 SS-3         | KII85613.1    |
| <i>Plicaturopsis crispa</i> FD-325 SS-3         | KII90441.1    |
| <i>Sphaerobolus stellatus</i> SS14              | KIJ56431.1    |
| <i>Hydnomerulius pinastri</i> MD-312            | KIJ69360.1    |
| <i>Gymnopus luxurians</i> FD-317 M1             | KIK53845.1    |
| <i>Serendipita vermifera</i> MAFF 305830        | KIM25608.1    |
| <i>Phlebiopsis gigantea</i> 11061_1 CR5-6       | KIP11288.1    |
| <i>Cylindrobasidium torrendii</i> FP15055 ss-10 | KIY62009.1    |
| <i>Cylindrobasidium torrendii</i> FP15055 ss-10 | KIY70325.1    |
| <i>Fibularhizoctonia</i> sp. CBS 109695         | KZP07860.1    |
| <i>Fibularhizoctonia</i> sp. CBS 109695         | KZP22139.1    |
| <i>Neolentinus lepideus</i> HHB14362 ss-1       | KZT20455.1    |
| <i>Trametes coccinea</i> BRFM310                | OSD07916.1    |
| <i>Amanita thiersii</i> Skay4041                | PFH45132.1    |

**Table S3.** List of selected animal and animal-like  $\alpha$ -amylases for sequence alignment obtained from [16].

| Organism                                            | Abbreviation | Accession no. | C-terminus |
|-----------------------------------------------------|--------------|---------------|------------|
| <i>Drosophila melanogaster</i> (fruit fly)          | Drome        | CAA28238.1    |            |
| <i>Litopenaeus vannamei</i> (white shrimp)          | Penva        | CAA54524.1    |            |
| <i>Homo sapiens</i> (human, saliva)                 | Homsa        | AAA52279.1    |            |
| <i>Pseudomonas</i> sp. KFCC10818 (animal-like)      | Psesp        | AAA86835.1    |            |
| <i>Streptomyces limosus</i> (animal-like)           | Stmli        | AAA88554.1    | CBM20      |
| <i>Pseudoalteromonas haloplanktis</i> (animal-like) | Psaha        | CAA41481.1    | Extra C    |
| <i>Halomonas meridiana</i> (animal-like)            | Halme        | CAB92963.1    |            |
| <i>Microbulbifer degradans</i> (animal-like)        | Mibde-A      | ZP_00066069.1 | CBM20      |
| <i>Thermobifida fusca</i> (animal-like)             | Thefu        | ZP_00058434   | CBM20      |

## Figure

|         |                                                             |    |
|---------|-------------------------------------------------------------|----|
| HL11Amy | MPLLPLSSRLTH---ALTAASA--AFALVASPAH--ALNPNATSVQMFEWAWPDIAE   | 53 |
| Thefu   | MGVR---RSLAALLAALLGCATSLVALTVAASPAHAAPSNGNRDVI              | 56 |
| Drome   | --MF----LAKSIVCLALLAVANA--QFD-----TNYASGRSGMVHIFQWRWKSIADE  | 45 |
| Penva   | ---M----LRVAPLVVLLAAAAQA--QWD-----PNS-SNGQVIHIFEWKWSIDIAE   | 43 |
| Homsa   | -----MKLFWLL-FTIGFCWA--QYS-----SNTQQGRTSIVHIFEWRWVDIAE      | 42 |
| Pseesp  | MKFN---KSLSA-GLMLFGSLIG--GTQS-----YAQTVPKTTFVHIFEWSWQDIAE   | 47 |
| Mibde-A | ---M----RKL-T-QLFIFAAAL---FSI-----CSHAQPRTAFVHIFEWQWNDIAE   | 41 |
| Stmli   | --MA----RRLATASLAVLAAAAT--ALTAPTAA-AAPPGAKDVTAVIFEWKFASVARA | 51 |
| Psaha   | MKLN---KIITTAGLS-----LG--LLLP-----SIATATPTTFVHIFEWNWQDVAQE  | 43 |
| Halme   | -----M-----CG--PRLPPRPSGRGFTRVFADTFVHIFEWQWEDVAQE           | 37 |

  

|         |                                                               |     |
|---------|---------------------------------------------------------------|-----|
| HL11Amy | CTQWLGPKEGGVQISPPGASKN-----ANGWWGVYQPVNYANLTSRMGTPAQLQSMIS    | 107 |
| Thefu   | CRTTLGPHGFAGVQVSPPEHVVLP--AEDYPWWQDYQPVSYKLDQTRRGSRADIFIDMVN  | 114 |
| Drome   | CENFLGPNYAGVQVSPVNENAV---KDSRPWWERYQPVISYKLE-TRSGNEEQFASMVK   | 100 |
| Penva   | CENFLGPRGFAGVQVSPPNNEYVEVYQGDVKRPWWERYQPVSYKLV-TRSGDENAFKDMVT | 102 |
| Homsa   | CERYLAPKGGVQVSPPNENVAIH--NPFRPWWERYQPVSYKLC-TRSGNEDEFERNMVT   | 99  |
| Pseesp  | CEEFLGPKGFAAVQVSPPKQSV-----NPAAWWSRYQPVSYAFE-GRSGNRAQFADMVQ   | 100 |
| Mibde-A | CENVLGPKGYAAVQVSPPKQSVS-----SSQWWWSRYQPVSYAIE-GRSGNRNEFASMVS  | 94  |
| Stmli   | CTDSLGPAGYGYVQVSPPEHIQ-----GSQWWTSYQPVSYKIA-GRLGDRAAFKSMVD    | 104 |
| Psaha   | CEQYLGPKGYAAVQVSPPEHIT-----GSQWWTRYQPVSYELQ-SRSGNRAQFIDMVN    | 96  |
| Halme   | CENWLGPKGFKAVQVSPPEHIQ-----GDAWWTRYQPVSYQLE-SRSGSSEAFADMVQ    | 90  |

  

|         |                                                              |     |
|---------|--------------------------------------------------------------|-----|
| HL11Amy | ACHAAGVRVYADIVNQADGS----GTATDGSTWNAATLTYPFFSASD-FHPNCA----   | 158 |
| Thefu   | TCREAGVKIYVDAVINHMTGTGSAGAGPGSAGSSYSKY--DYPGIYQSQ-DFNDCR---- | 167 |
| Drome   | RCNAVGVRTYVDVFNHMAADG---GTGTGGSTASPSKSYPGVPYSSLDNFPT-----    | 152 |
| Penva   | RCNNVGRIYVDAVINHMSGGW-PMGTGASGGSSFDGAESYPGPVPSAFDFDNGNCHTG   | 161 |
| Homsa   | RCNNVGRIYVDAVINHMCNAVSAGTSSTCGSYFNPGRDFPAVPYSGWDFDNGKCKTG    | 159 |
| Pseesp  | RCKNVGVDIYVDAVINHMAAWN-----R-----NFPEVPYGVNDFNSCT----        | 139 |
| Mibde-A | RCKNAGVDIYVDAVINHMAAGG-----R-----YYPEVPYYAEHFHTCY----        | 133 |
| Stmli   | TCHAGVKVYVDAVINHMAAGS----GTGTGGSAYQKY--DYPGIWGA-DMDDCR----   | 153 |
| Psaha   | RCSAAGVDIYVDTLINHMAAGS----GTGTAGNSFGNK--SFPIYSPQD-FHESCT---- | 145 |
| Halme   | RCNAGVDVYADAVINHVAHGK----GQGIAGSSYDSEALSYPHYQRDD-FHEPCG----  | 141 |

  

|         |                     |                                             |     |
|---------|---------------------|---------------------------------------------|-----|
| HL11Amy | -INDADYNPAGRSNVQN   | CRLGGLPDLATESSYVQGQIVNYLKSLLALGVDGFRIDAAKH  | 217 |
| Thefu   | -RDITNWN---DKWEVQH  | CELVGLADLKTSSPYVDRIAYLNELIDLGVAGFRIDAAKH    | 223 |
| Drome   | -CAISNYG---DANEVRN  | CELVGLRDLNQNSYVQDKVVEFLDHLIDLGVAGFRIDAAKH   | 208 |
| Penva   | SGNIENY---DANQVRN   | CKLVGLNDLNLQGTDYVRGKIREFMNKLISYGVAGFRIDASKH | 218 |
| Homsa   | SGDIENYN---DATQVRD  | CRLSGLLDLALGKDYVRSKIAEYMNHLIDIGVAGFRIDASKH  | 216 |
| Pseesp  | --SDINYSN---RWSVQN  | CDLVGLNDLKTSSSEYVRQKIADYMNDAISMVAGFRIDAAKH  | 194 |
| Mibde-A | --GQIDYGN---RWQVQN  | CDLVGLNDLATEQDYVRTKIANYLNDLTNLGVAGFRIDAAKH  | 188 |
| Stmli   | -SEINDYGN---RANVQN  | CELVGLADLDTGESYVRDRIAYLNDLLSLGVDGFRIDAAKH   | 209 |
| Psaha   | -INNSDYGN---DRYRVQN | CELVGLADLDTASNYVQNTIAAYINDLQAIGVKGFREDAKH   | 202 |
| Halme   | -IEQSDYAQ--NAESVRQ  | CQLVGLPDLNLTSDPTVQSRIADYLDTLAALGVGGIRIDAAKH | 198 |

  

|         |                                 |                  |                 |     |
|---------|---------------------------------|------------------|-----------------|-----|
| HL11Amy | MPASAWTSIMSAVKTAYPKT--LQGENIWVT | QSIINDG--EVDPRS  | YFPIGTINEFQFTY  | 273 |
| Thefu   | IPEGDLQAILSRKKNVHPAWG---GGKPYIF | QEVIAAD--STISTGS | YTHLGSVTEFQYHR  | 278 |
| Drome   | MWPADLAVIYGRKLNLTDHGFASGSKAYIV  | QEVIDMGGEAISKS   | EYTGIGAITEFRHSD | 268 |
| Penva   | MWPGDMKAIFDSLNDLNTDF-FKAGARPFIF | QEVIDLGGGEAISSGE | YVGNRVRTFRYK    | 277 |
| Homsa   | MWPGDIKAILDKLHNLNSNW-FPEGSKPFYI | QEVIDLGGGEPIKSSD | YFGNVRVTEFKYGA  | 275 |
| Pseesp  | MPAEDIAAIAKSKLH-----GTPYIF      | QEVIGAENEPVKPAE  | EYTYIGDVTEFFAR  | 243 |
| Mibde-A | IPVGDIAAIAKAKLI-----GNPYIF      | QEVIGAPGEPIQPSE  | EYTYLADVTEFNFTK | 237 |
| Stmli   | MPAADLTAIAKAVGN-----GSTYWK      | QEAIHGAGEAVQPSE  | EYLTGTDVQEFYAR  | 259 |
| Psaha   | VAASDIQSLMAKVN-----GSPVVF       | QEVIDQGGGEAVGASE | EYLTGLVTEFKYST  | 251 |
| Halme   | MAPSDIAEILAQVD-----APLYAF       | QEVIDLGGGEAISATE | EYQGTADITEFRYGA | 247 |

  

|         |                                           |             |                |     |
|---------|-------------------------------------------|-------------|----------------|-----|
| HL11Amy | ALRDVFRGNNGNTLSSLPGIMGTGWNWGGSWGFIQPQNATV | FVTNWD      | TERNGSSSLNINNA | 333 |
| Thefu   | DISHAFAN---GNIAHL-----TGLG--SGLTPSDKAVF   | FVNVHDTQRYE | -----PI-       | 320 |
| Drome   | SIGKVFRG--KDQLQYL-----TNWGTAWGFAASDRSLV   | FVDNHDNQR   | GHGAGGADV-     | 318 |
| Penva   | YLGEAFRG--NNQLKYL-----NNFGEWGMIDRHDALV    | FIDNHDNQR   | GHGAGGDMI-     | 327 |
| Homsa   | KLGTVIRKWNGEKMSYL-----KNWGEWGMFMPSDRALV   | FVDNHDNQR   | GHGAGGASI-     | 327 |
| Pseesp  | TLGPKFKH---GGIKDL-----QGIGSWNGWLSSSDAVT   | FVTNHD      | DEERHNP        | 289 |
| Mibde-A | SVSHFFKG--RGPIKEL-----KNIGTWGGWVASADAVT   | FVANHDNQR   | QDTN---NT-     | 284 |

|           |                                                               |                                          |     |
|-----------|---------------------------------------------------------------|------------------------------------------|-----|
| Stmli     | DLKRVFQN---ENLAHL-----KNFGEDWGYMASGKSAVFVDNH                  | TERGG-----DT-                            | 303 |
| Psaha     | ELGNTFRN---GSLAWL-----SNFGEGWGFMPSSSAVFVDNH                   | DNQRGHGGAG-NV-                           | 299 |
| Halme     | SLGDIFNN---QALANL-----QQFGESPALLPSEQAIVFTDNH                  | DNQRGHGAGGSNI-                           | 296 |
| $\beta 8$ |                                                               |                                          |     |
| HL11Amy   | AGNDAANQRYTLANIFMLAQGYAEALYSSEKFSN-----                       | TDADRPTTSPYSGGVP                         | 384 |
| Thefu     | LTHTD-GARYDLAQKFMALHPYGTpkVMSSYTWSGD-----                     | DKAGPPMHSdGTT---                         | 368 |
| Drome     | LTYKV-PKQYKMASAFMLAHFFGTPrVMSSFSFTD-----                      | TDQGPPTTDGHNIASP                         | 368 |
| Penva     | LTFRV-SKQYKMATAYMLAWPYGYTRVMSSYYWDQWWENGQDKNDWIGPPHDGSGFNIISP |                                          | 386 |
| Homsa     | LTFRV-SKQYKMATAYMLAWPYGYTRVMSSYYWDQWWENGQDKNDWIGPPHDGSGFNIISP |                                          | 386 |
| Pseps     | LSHQDFGNLYFLGNVFTLAYPYGYPKVMSSGYFND-----                      | FDAGPPATGIHTG---                         | 337 |
| Mibde-A   | ITHKDGDNRTMAHVFMLGWPYGYPKVMSSYEWYD-----                       | HDQGPFAHGASSC---                         | 332 |
| Stmli     | LNyKN-GSAYTLAGVFMLAWPYGSPDVHSGYEFTD-----                      | HDAGPPNGGT-----                          | 347 |
| Psaha     | ITFED-GRLYDLANVFMLAYPYGYPKVMSSYDFHGD-----                     | TDAGGPNVPVHNN---                         | 347 |
| Halme     | LTHRD-DQLYRLANFMFLAWPYGYPKVMSSYAFSN-----                      | SDQGPQAPVYQQ---                          | 343 |
| HL11Amy   | QI-----NVVWDFAHRW                                             | TPLANMVGFRNAS-IGQAQQNWTVGDNQVAFSRGNVGFV  | 436 |
| Thefu     | ---RPTDCSADRWLCEHR--                                          | AVAGMVGfHNAV-AGQGIGSAV-TDGNRLAFARGSGAGYA | 421 |
| Drome     | IFNSDNsc-SGGWVCEHRWRQIYNMVAFRNTV-GSDEIQNWW-DNGSNQISFSRGSRGFV  |                                          | 425 |
| Penva     | SFNADGSC-GNGWICEHRWRQIYNMVAFRNTV-HGTDMDNWW-DNGSNQIAFCRGNKGFL  |                                          | 443 |
| Homsa     | TINPDTTC-GNDWVCEHRWRQIRNMVNFRNVV-DGQPFNTWY-DNGSNQVAFGRGNRGFI  |                                          | 442 |
| Pseps     | ---NACGFDGGDWVCEHRWRGVANMVAFRNHTAAEWRVTNWW-DDGYNQVAFGRGGLGFV  |                                          | 393 |
| Mibde-A   | -----NSGWLCEHRTPAIANMVAFRNFTADEFRVTNYW-DNGNNQIAWGRGGKGFV      |                                          | 382 |
| Stmli     | ---VNACYSdGWKQCHAWPELSSMVGLRNTA-SGQPVNTWW-DNGGDQIAFGRGDkAYV   |                                          | 401 |
| Psaha     | ---GNLECFASNWKCEHRWSYIAGGVDFRNTADNwAVTNWW-DNTNNQISFGRGSSGHM   |                                          | 403 |
| Halme     | ---GEAQc-GEAWVCEHRWPEIANMVAFRQQA-EGAEITHWW-DNGHHQIAFSREAQGGFI |                                          | 397 |

**Figure S1.** The alignment of  $\alpha$ -amylases from animal species and animal-like  $\alpha$ -amylases from fungal and bacterial species. The sequence alignment has been performed by Clustal W. The residues highlighted with yellow represent conserved residues found in animal and animal-like  $\alpha$ -amylases. Green represents catalytic triad and grey represents invariant residues. The information of these sequences are shown in Table S3.

## References

- Peng H.; Chen M.; Yi L.; Zhang X.; Wang M.; Xiao Y.; Zhang N. Identification and characterization of a novel raw-starch-degrading  $\alpha$ -amylase (AmyASS) from the marine fish pathogen *Aeromonas salmonicida* ssp. *salmonicida*. *J Mol Catal B Enzym* **2015**, *119*, pp. 71-77.
- Koropatkin N.M. and Smith T.J. SusG: A Unique cell-membrane-associated  $\alpha$ -amylase from a prominent human gut symbiont targets complex starch molecules. *Structure* **2010**, *18*, pp. 200-215.
- Li Z.; Wu J.; Zhang B.; Wang F.; Ye X.; Huang Y.; Huang Q.; Cui Z.; Liu S.J. AmyM, a novel maltohexaose-forming  $\alpha$ -amylase from *Coralloccoccus* sp. Strain EGB. *Appl Environ Microbiol* **2015**, *81*, pp. 1977-1987.
- Bai Y.; Huang H.; Meng K.; Shi P.; Yang P.; Luo H.; Luo C.; Feng Y.; Zhang W.; Yao B. Identification of an acidic  $\alpha$ -amylase from *Alicyclobacillus* sp. A4 and assessment of its application in the starch industry. *Food Chem* **2012**, *131*, pp. 1473-1478.
- Tawil G.; Viksø-Nielsen A.; Rolland-Sabaté A.; Colonna P.; Buléon A. Hydrolysis of concentrated raw starch: A new very efficient  $\alpha$ -amylase from *Anoxybacillus flavothermus*. *Carbohydr Polym* **2012**, *87*, pp. 46-52.
- Gangadharan D.; Nampoothiri K.M.; Sivaramakrishnan S.; Pandey A. Biochemical characterization of raw-starch-digesting alpha amylase purified from *Bacillus amyloliquefaciens*. *Appl Bioche. Biotechnol.* 653-662.
- Puspasari F.; Radjasa O.K.; Noer A.S.; Nurachman Z.; Syah Y.M.; van der Maarel M.; Dijkhuizen L.; Janeček Š.; Natalia D. Raw starch-degrading  $\alpha$ -amylase from *Bacillus aquimaris* MKSC 6.2: isolation and expression of the gene, bioinformatics and biochemical characterization of the recombinant enzyme. *J Appl Microbiol* **2013**, *114*, pp. 108-120.

8. Shofiyah S.S.; Yuliani D.; Widya N.; Sarian F.D.; Puspasari F.; Radjasa O.K.; Ihsanawati; Natalia D. Isolation, expression, and characterization of raw starch degrading  $\alpha$ -amylase from a marine lake *Bacillus megaterium* NL3. *Heliyon* **2020**, *6*, pp. e05796.
9. Vidilaseris K.; Hidayat K.; Retnoningrum D.S.; Nurachman Z.; Noer A.S.; Natalia D. Biochemical characterization of a raw starch degrading  $\alpha$ -amylase from the Indonesian marine bacterium *Bacillus* sp. ALSHL3. *Biologia* **2009**, *64*, pp. 1047-1052.
10. Roy J.K.; Borah A.; Mahanta C.L.; Mukherjee A.K. Cloning and overexpression of raw starch digesting  $\alpha$ -amylase gene from *Bacillus subtilis* strain AS01a in *Escherichia coli* and application of the purified recombinant  $\alpha$ -amylase (AmyBS-I) in raw starch digestion and baking industry. *J Mol Catal B Enzym* **2013**, *97*, pp. 118-129.
11. Shivilata L. and Satyanarayana T. Characteristics of raw starch-digesting  $\alpha$ -Amylase of *Streptomyces badius* DB-1 with transglycosylation activity and its applications. *Appl Biochem Biotechnol* **2017**, *181*, pp. 1283-1303.
12. Peng H.; Zheng Y.; Chen M.; Wang Y.; Xiao Y.; Gao Y. A starch-binding domain identified in  $\alpha$ -amylase (AmyP) represents a new family of carbohydrate-binding modules that contribute to enzymatic hydrolysis of soluble starch. *FEBS Lett* **2014**, *588*, pp. 1161-1167.
13. Attanayaka D.P.S.T.G.; Silva S.N.T.D.; Nirosha S.F.; Aththanayaka A.M.W.S. Isolation of raw starch hydrolysing fungi and purification of  $\alpha$ -amylase from *Geotrichum candidum* CMSS06. *Journal of the National Science Foundation of Sri Lanka* **2009**, *37*, pp. 93-98.
14. Tawil G.; Viksø-Nielsen A.; Rolland-Sabaté A.; Colonna P.; Buléon A. In depth study of a new highly efficient raw starch hydrolyzing  $\alpha$ -amylase from *Rhizomucor* sp. *Biomacromolecules* **2011**, *12*, pp. 34-42.
15. Hostinová E.; Janeček Š.; Gašperík J. Gene Sequence, Bioinformatics and enzymatic characterization of  $\alpha$ -amylase from *Saccharomycopsis fibuligera* KZ. *Protein J* **2010**, *29*, pp. 355-364.
16. Da Lage J.L.; Feller G.; Janecek S. Horizontal gene transfer from Eukarya to bacteria and domain shuffling: the alpha-amylase model. *Cell Mol Life Sci* **2004**, *61*, pp. 97-109.
